# Supplementary material
Source: Springer Nature journal article supplement (https://www.springermedizin.de/resource/supplementary/12985_2009_781_MOESM8_ESM.pdf/9609148)

Hours after infection

**A**

24

48

72

96

IFN- $\alpha$  (-)

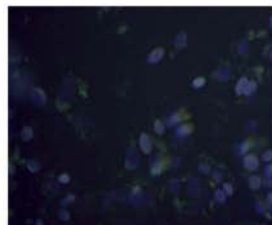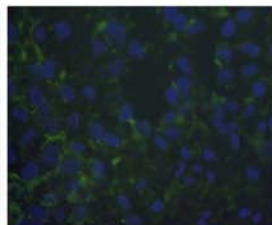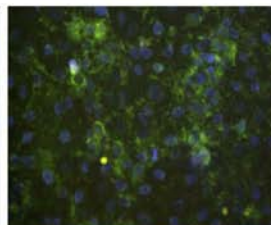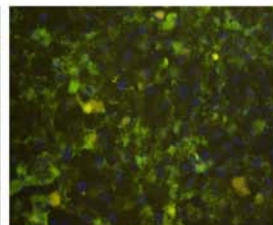

IFN- $\alpha$  (+)

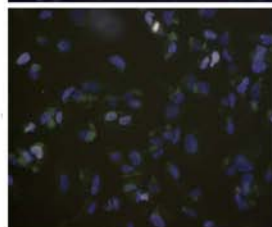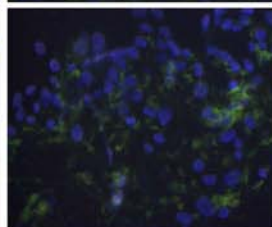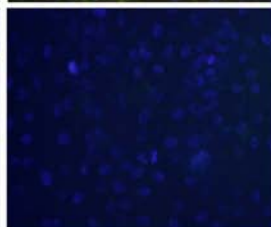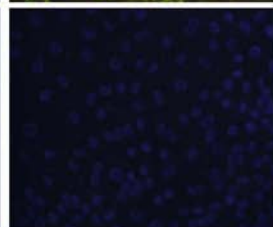

**B**

24

48

72

96

IFN- $\alpha$  (-)

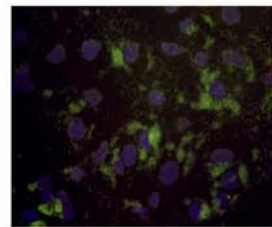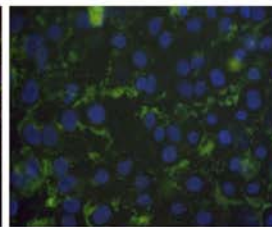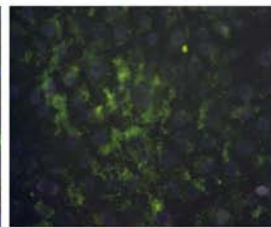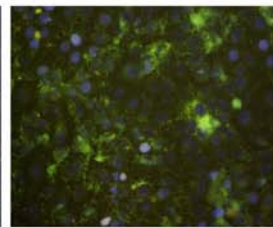

IFN- $\alpha$  (+)

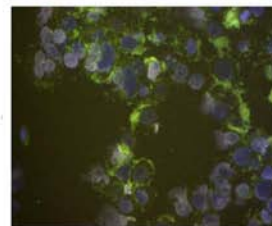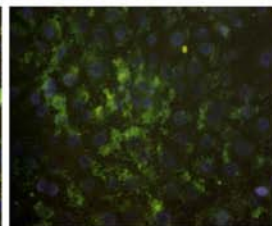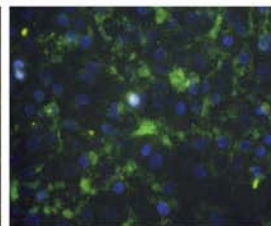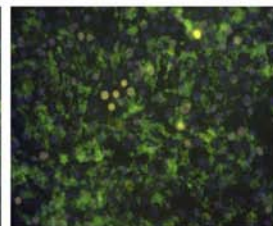

Supplement: MOESM8 [file 9609148]
